# Supplementary figures and images for: Preclinical investigations towards the first spacer gel application in prostate cancer treatment during particle therapy at HIT
Source: Springer Nature journal article supplement (doi:10.1186/1748-717x-8-134), 2013-06-06

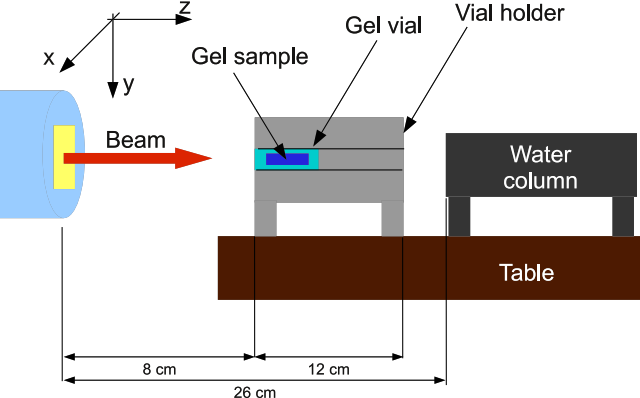

Supplement: 13014_2013_875_MOESM1_ESM.pdf [file 13014_2013_875_MOESM1_ESM.pdf]

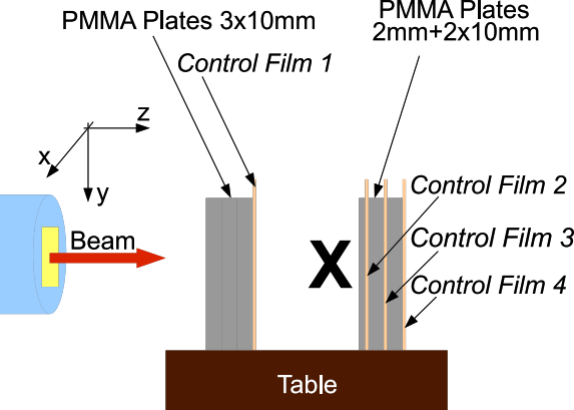

Supplement: 13014_2013_875_MOESM2_ESM.pdf [file 13014_2013_875_MOESM2_ESM.pdf]

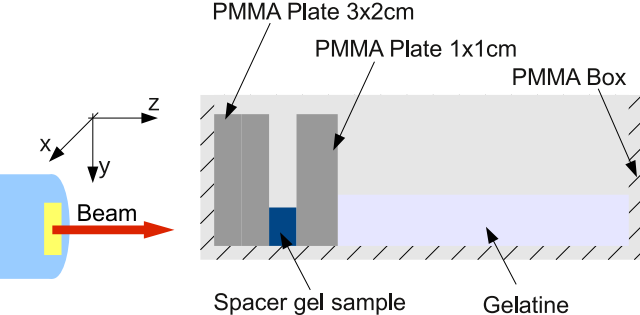

Supplement: 13014_2013_875_MOESM3_ESM.pdf [file 13014_2013_875_MOESM3_ESM.pdf]

DAR\_SpacerGelVial-CT.ctx

A

Slice: 17 49,50 mm

F : 375 226,45 - 227,05 mm

S : 463 279,73 - 280,33 mm

Air bubbles

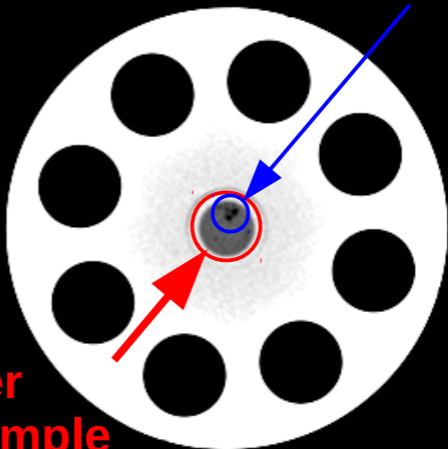

Spacer  
gel sample

Supplement: 13014_2013_875_MOESM4_ESM.pdf [file 13014_2013_875_MOESM4_ESM.pdf]

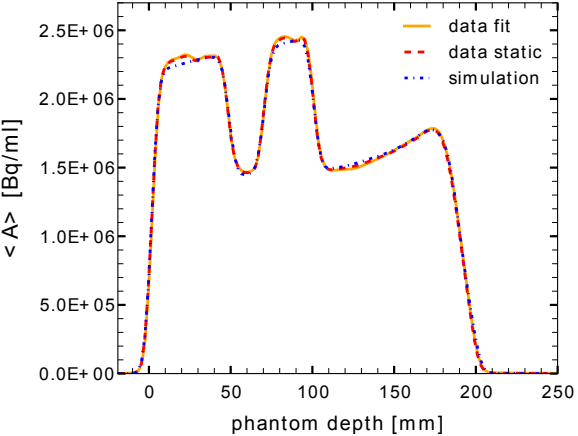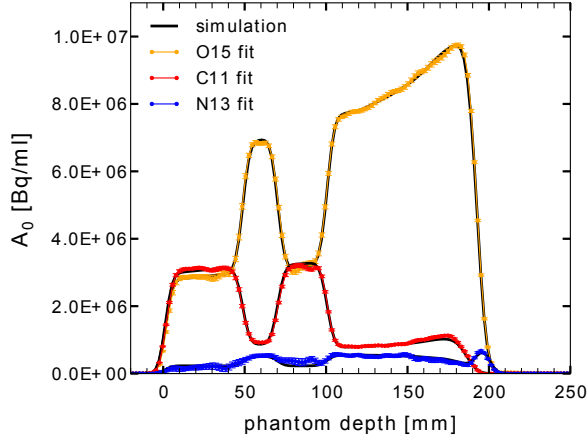

Supplement: 13014_2013_875_MOESM5_ESM.pdf [file 13014_2013_875_MOESM5_ESM.pdf]

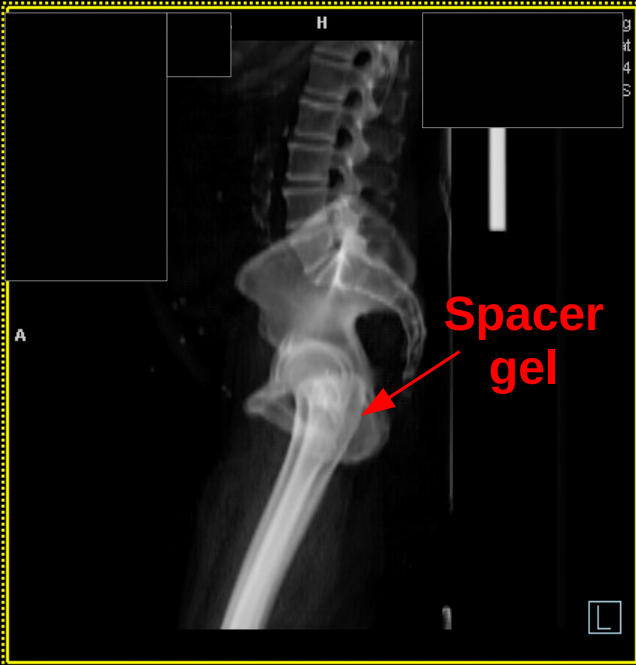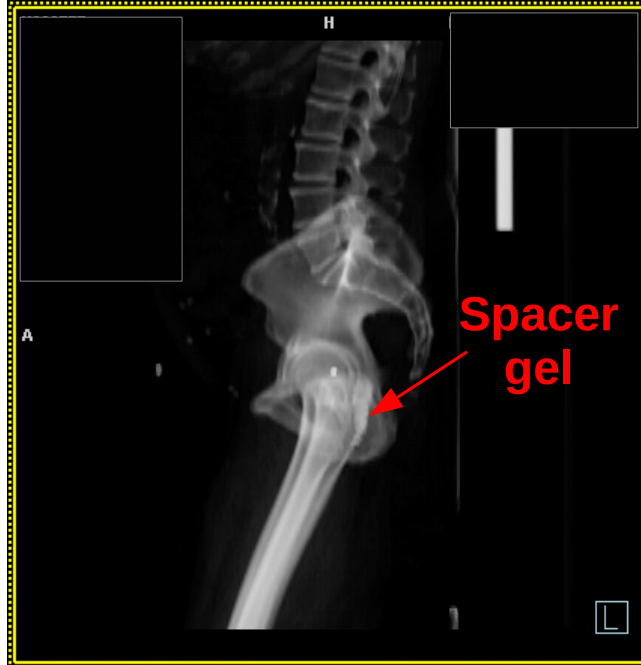

Supplement: 13014_2013_875_MOESM6_ESM.pdf [file 13014_2013_875_MOESM6_ESM.pdf]
